# Supplementary material for: Effect of build orientation and heat treatment on the microstructure, mechanical and corrosion performance of super duplex stainless steels fabricated via laser powder bed fusion
Source: Royal Society of Chemistry journal article supplement (doi:10.1039/d4ma00448e), 2024-01-01

## Supplementary Information

Figures attached are saved as OriginPro files with associated data in each figure.

Fig. S1 Volumetric powder particle distribution

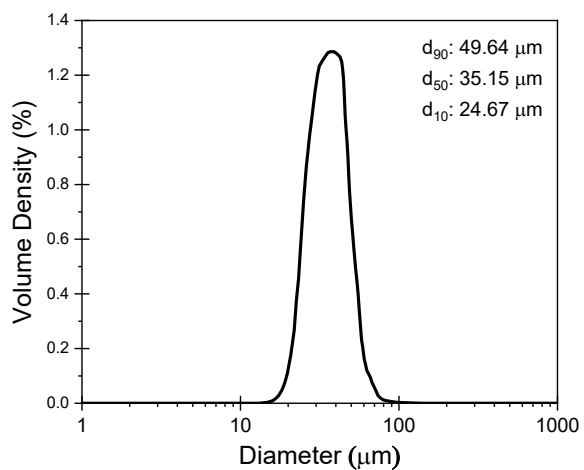

Fig. S2 XRD pattern of powder

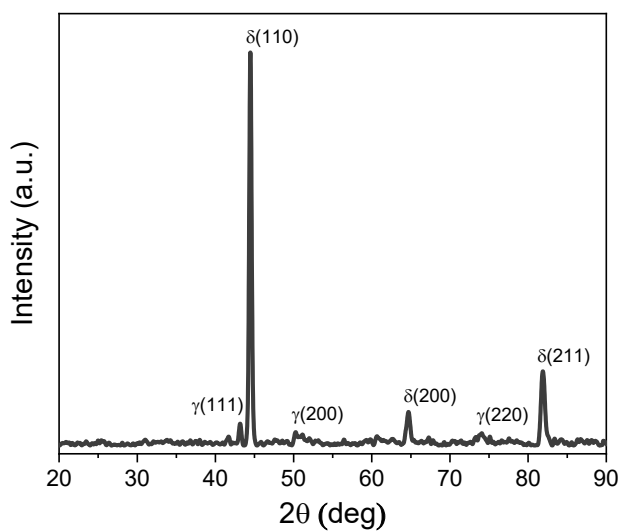

Fig. S3 Sample density and porosity percentage

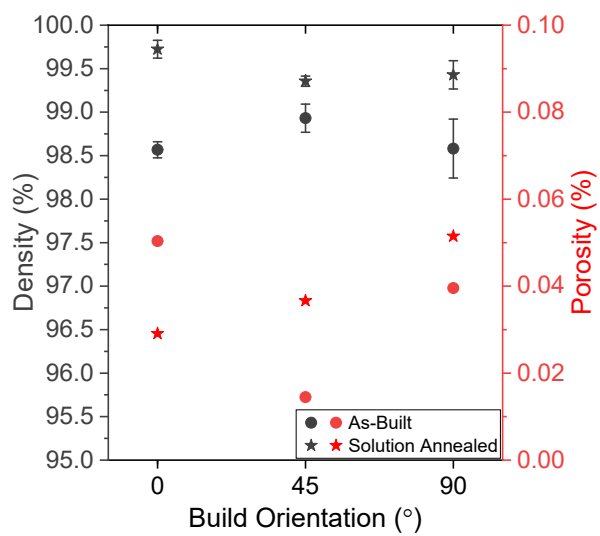

Fig. S4 XRD pattern of as built samples

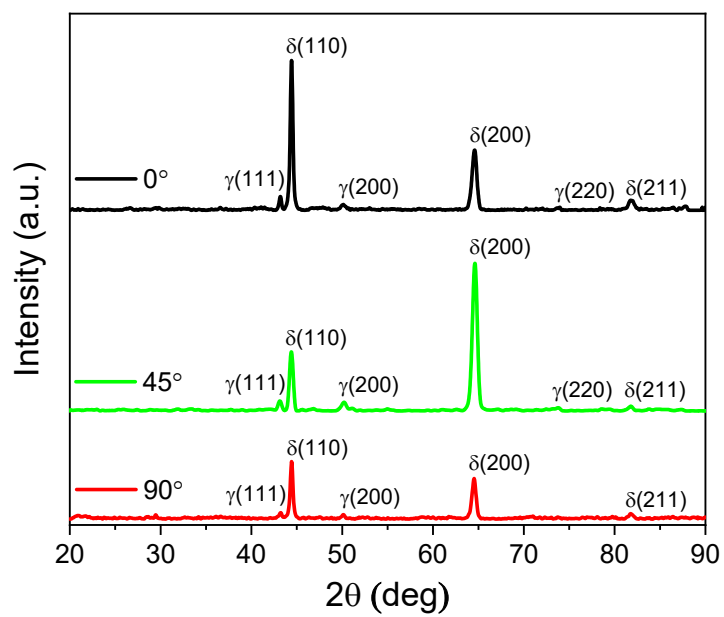

Fig. S5 XRD pattern of solution annealed samples

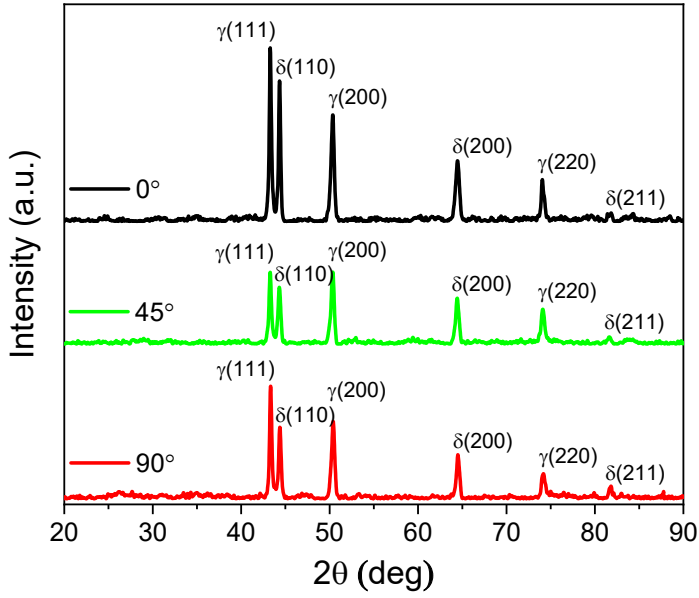

Fig. S6 Misorientation angle histograms of  $\delta$ -ferrite: $\gamma$ -austenite interfaces of As Built samples in the  $0^\circ$  build orientation

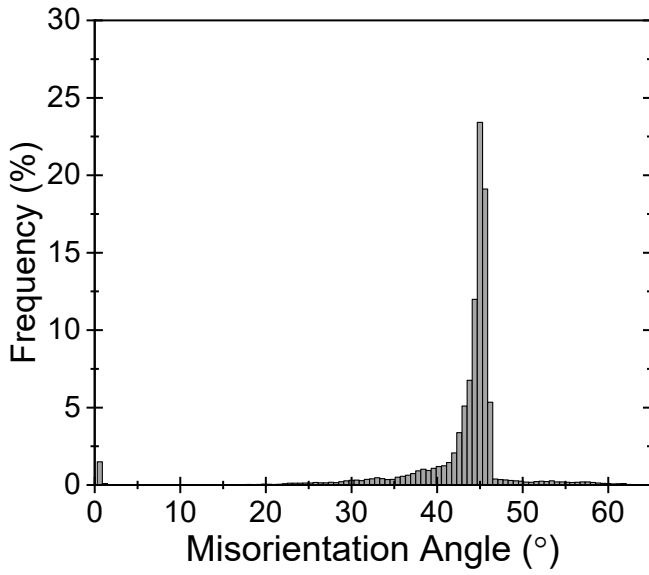

Fig. S7 Misorientation angle histograms of  $\delta$ -ferrite: $\gamma$ -austenite interfaces of As Built samples in the  $45^\circ$  build orientation

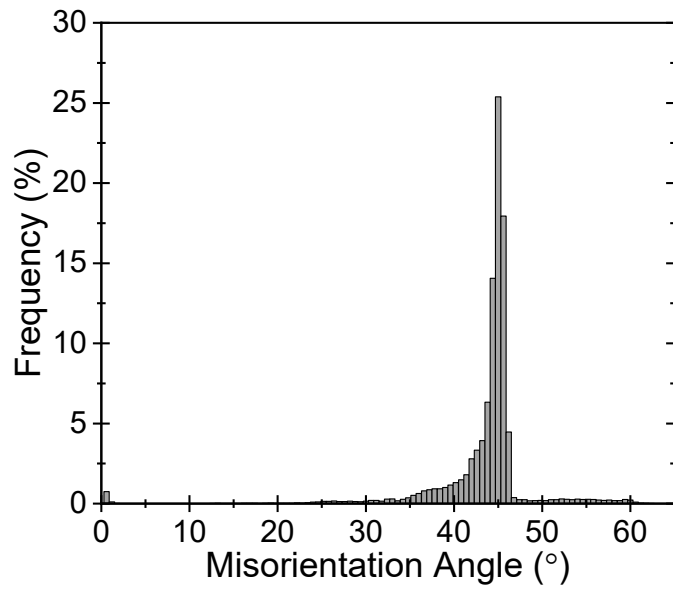

Fig. S8 Misorientation angle histograms of  $\delta$ -ferrite: $\gamma$ -austenite interfaces of As Built samples in the 90° build orientation

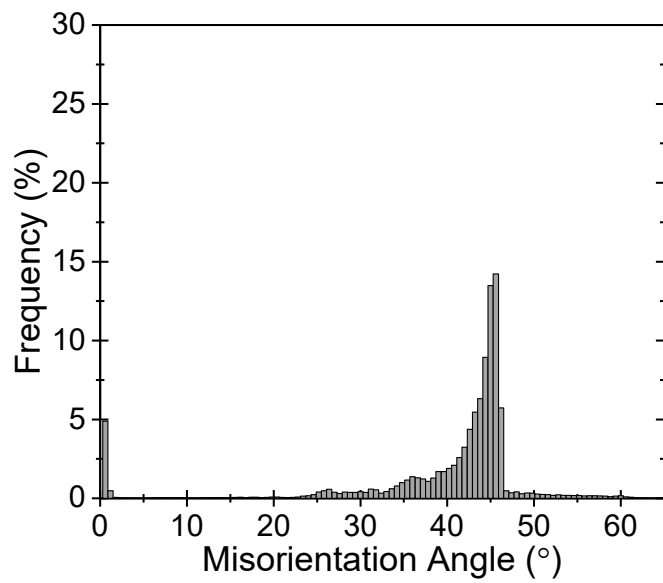

Fig. S9 Misorientation angle histograms of  $\delta$ -ferrite:  $\delta$ -ferrite interfaces of As Built samples in the 0° build orientation

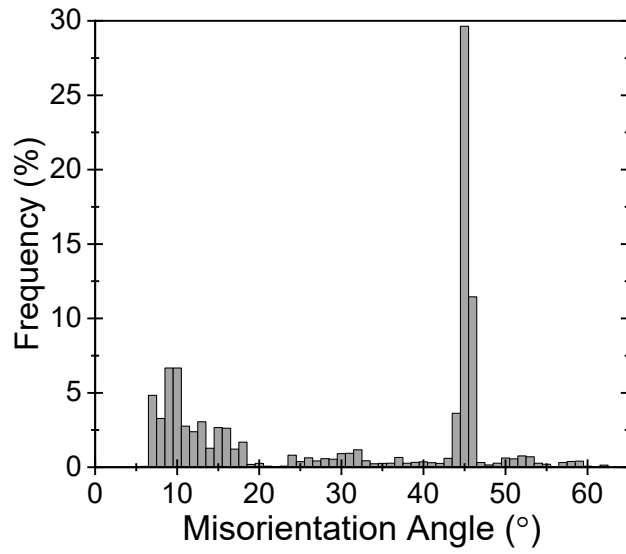

Fig. S10 Misorientation angle histograms of  $\delta$ -ferrite:  $\delta$ -ferrite interfaces of As Built samples in the 45° build orientation

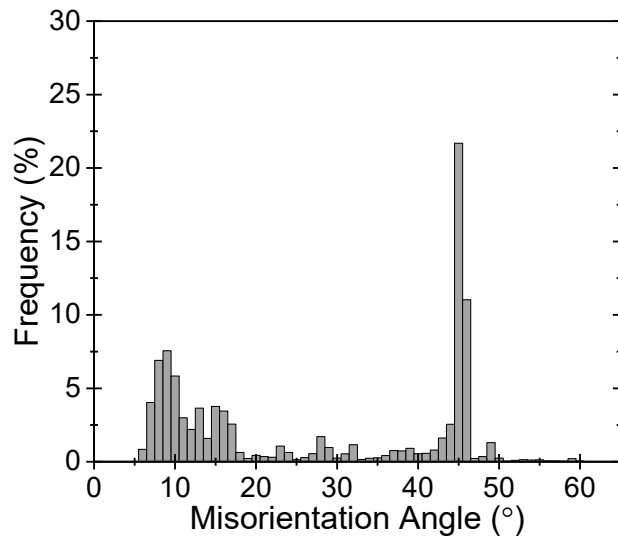

Fig. S11 Misorientation angle histograms of  $\delta$ -ferrite:  $\delta$ -ferrite interfaces of As Built samples in the 90° build orientation

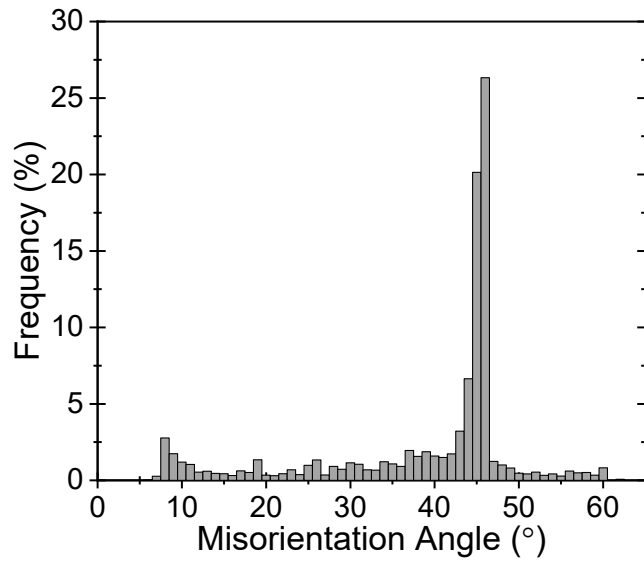

Fig. S12 Misorientation angle histograms of  $\gamma$ -austenite: $\gamma$ -austenite interfaces of As Built samples in the 0° build orientation

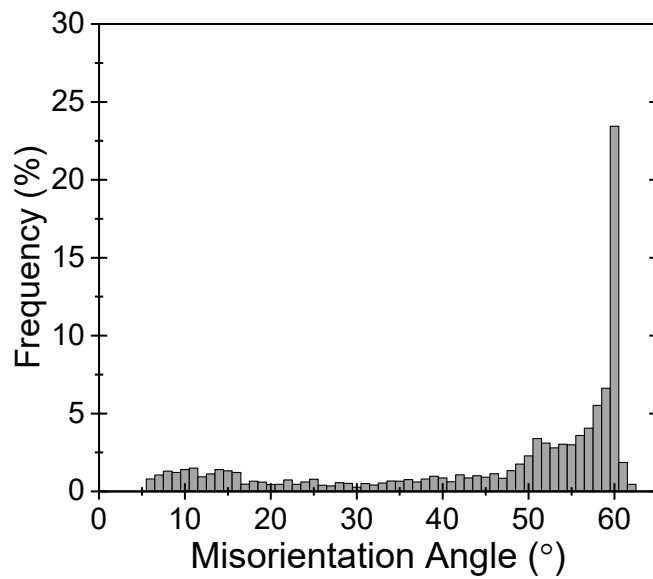

Fig. S13 Misorientation angle histograms of  $\gamma$ -austenite: $\gamma$ -austenite interfaces of As Built samples in the 45° build orientation

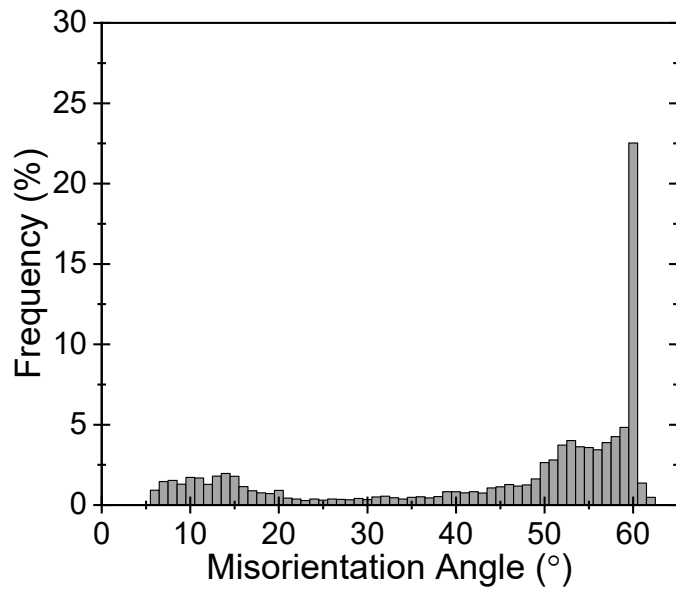

Fig. S14 Misorientation angle histograms of  $\gamma$ -austenite: $\gamma$ -austenite interfaces of As Built samples in the 90° build orientation

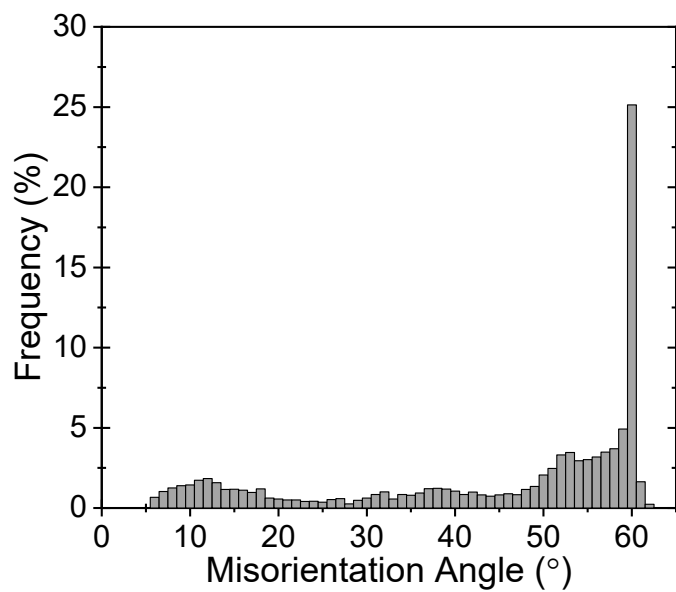

Fig. S15 Misorientation angle histograms of  $\delta$ -ferrite: $\gamma$ -austenite interfaces of Solution Annealed samples in the 0° build orientation

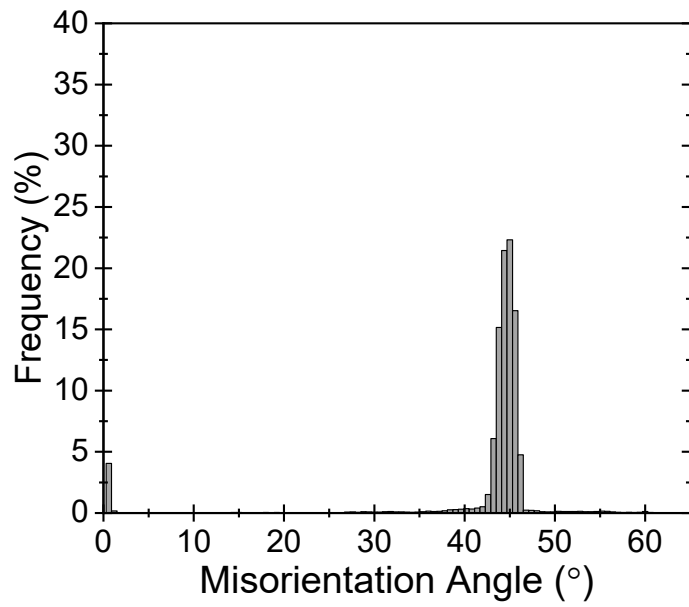

Fig. S16 Misorientation angle histograms of  $\delta$ -ferrite: $\gamma$ -austenite interfaces of Solution Annealed samples in the 45° build orientation

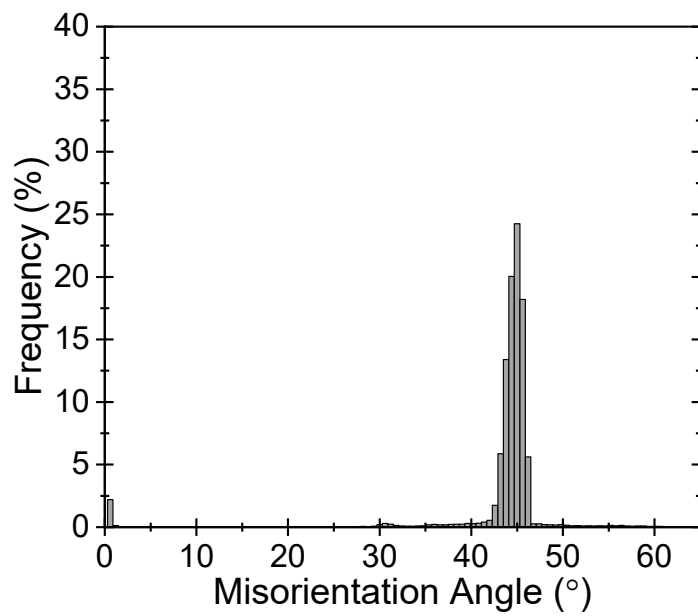

Fig. S17 Misorientation angle histograms of  $\delta$ -ferrite: $\gamma$ -austenite interfaces of Solution Annealed samples in the 90° build orientation



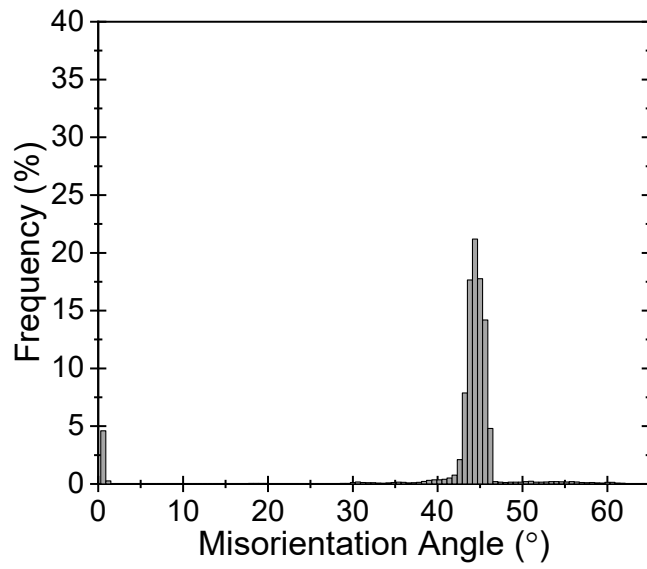

Fig. S18 Misorientation angle histograms of  $\delta$ -ferrite:  $\delta$ -ferrite interfaces of Solution Annealed samples in the 0° build orientation

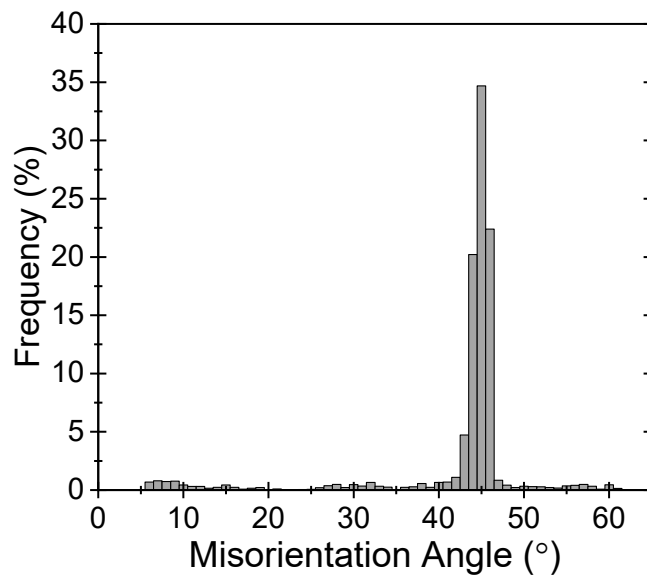

Fig. S19 Misorientation angle histograms of  $\delta$ -ferrite:  $\delta$ -ferrite interfaces of Solution Annealed samples in the 45° build orientation

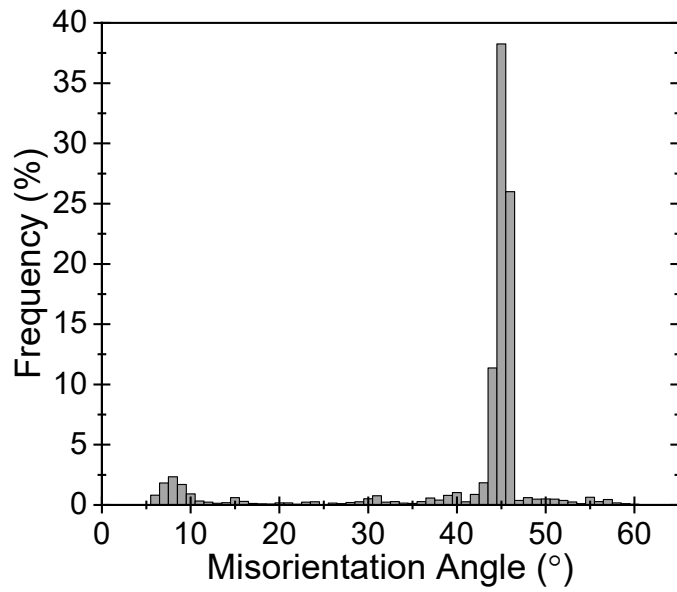

Fig. S20 Misorientation angle histograms of  $\delta$ -ferrite:  $\delta$ -ferrite interfaces of Solution Annealed samples in the 90° build orientation

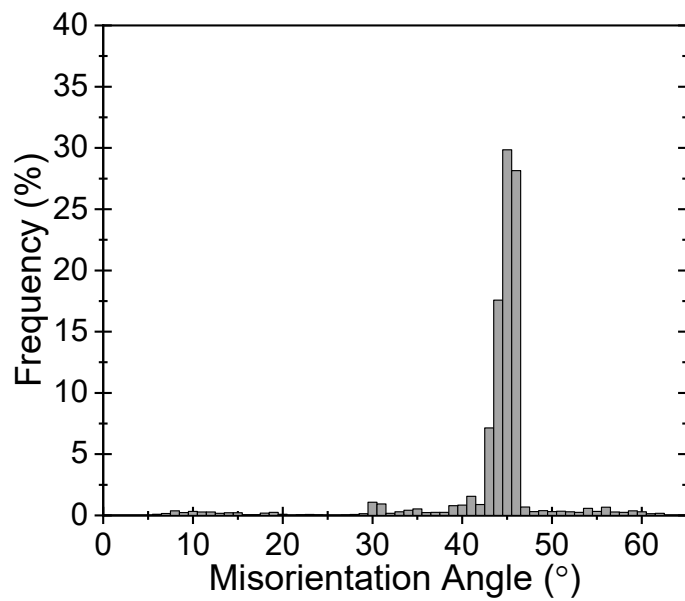

Fig. S21 Misorientation angle histograms of  $\gamma$ -austenite:  $\gamma$ -austenite interfaces of Solution Annealed samples in the 0° build orientation

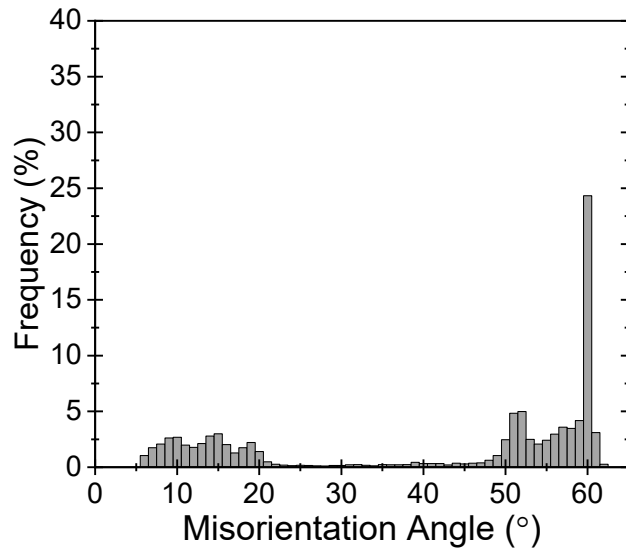

Fig. S22 Misorientation angle histograms of  $\gamma$ -austenite: $\gamma$ -austenite interfaces of Solution Annealed samples in the 45° build orientation

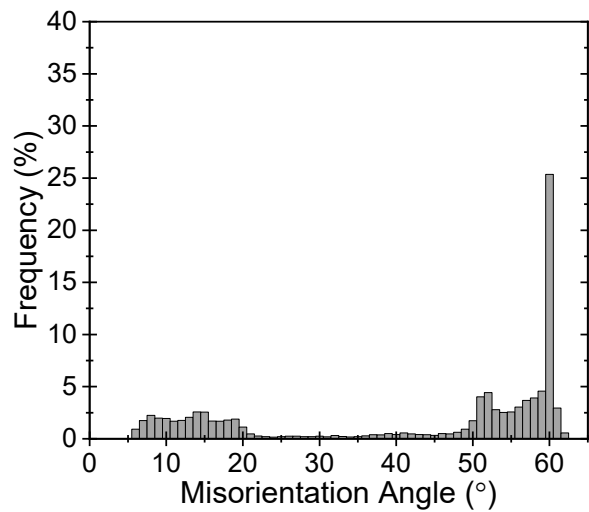

Fig. S23 Misorientation angle histograms of  $\gamma$ -austenite: $\gamma$ -austenite interfaces of Solution Annealed samples in the 90° build orientation

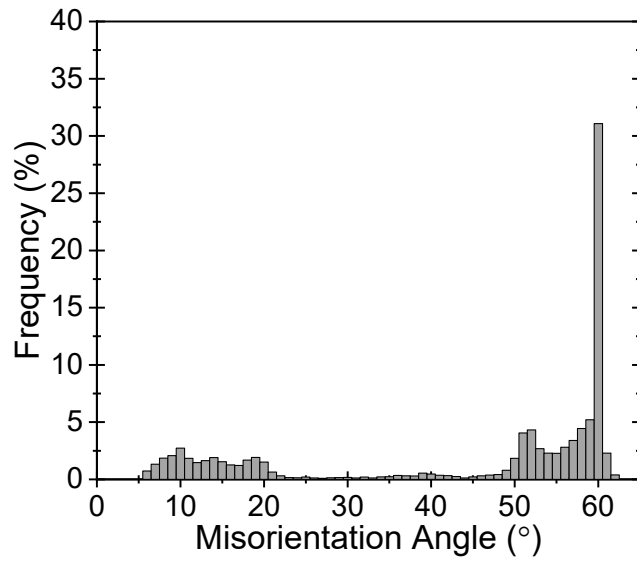

Fig. S24 Instrumented indentation hardness mapping of As-Built sample in the 0° build orientation

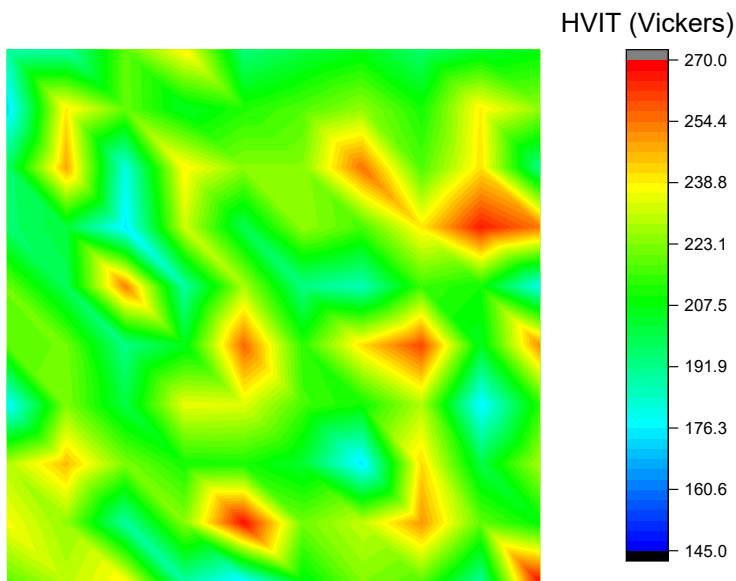

Fig. S25 Instrumented indentation hardness mapping of As-Built sample in the 45° build orientation

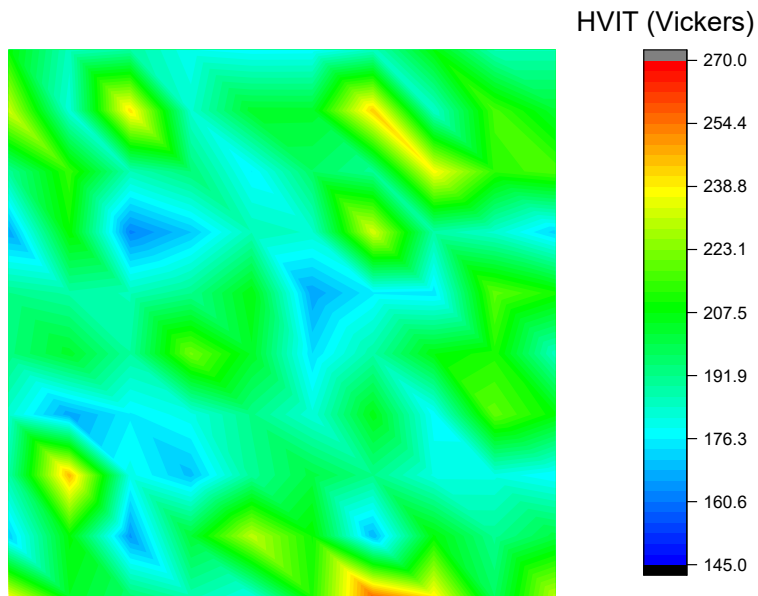

Fig. S26 Instrumented indentation hardness mapping of As-Built sample in the 90° build orientation

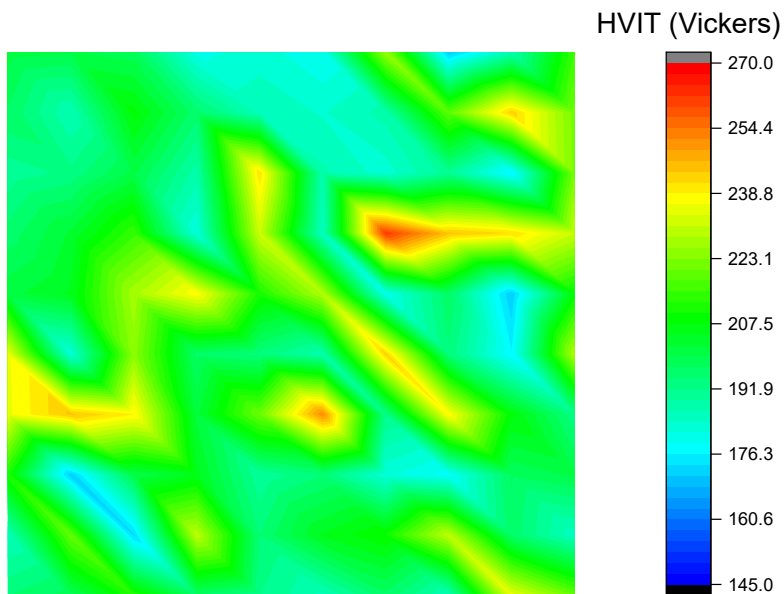

Fig. S27 Instrumented indentation hardness mapping of Solution Annealed sample in the 0° build orientation

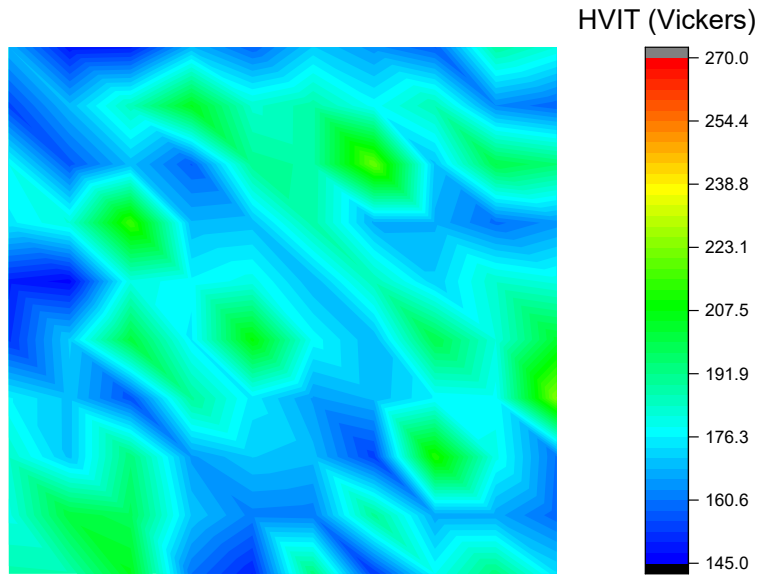

Fig. S28 Instrumented indentation hardness mapping of Solution Annealed sample in the 45° build orientation

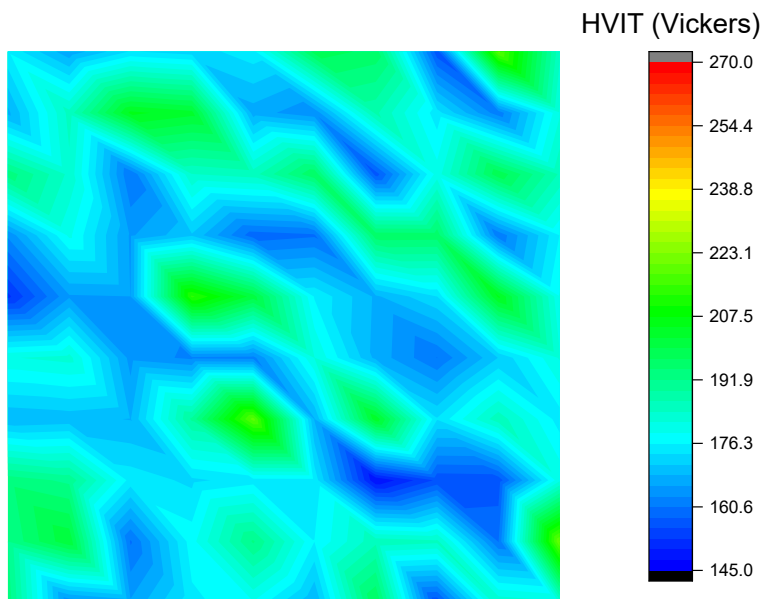

Fig. S29 Instrumented indentation hardness mapping of Solution Annealed sample in the 90° build orientation

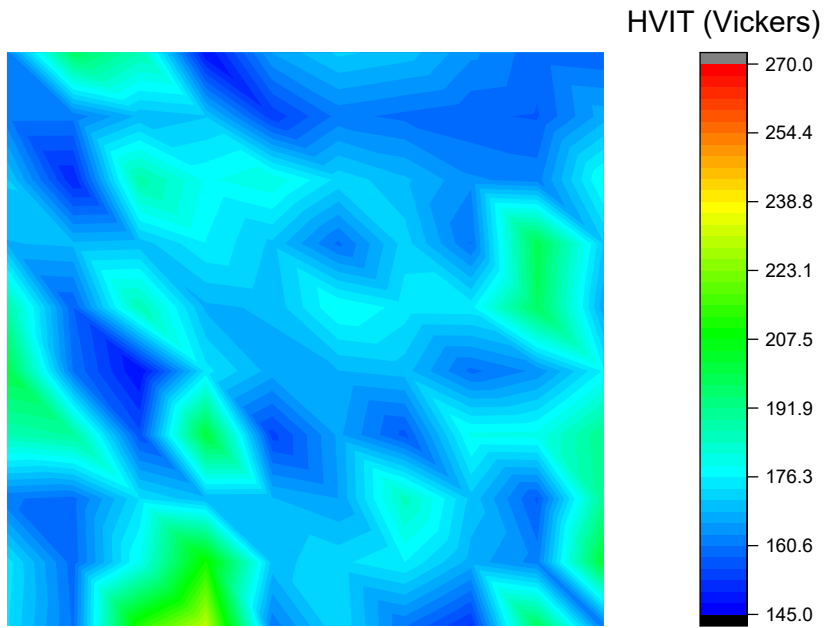

Fig. S30 Tensile results of As Built samples

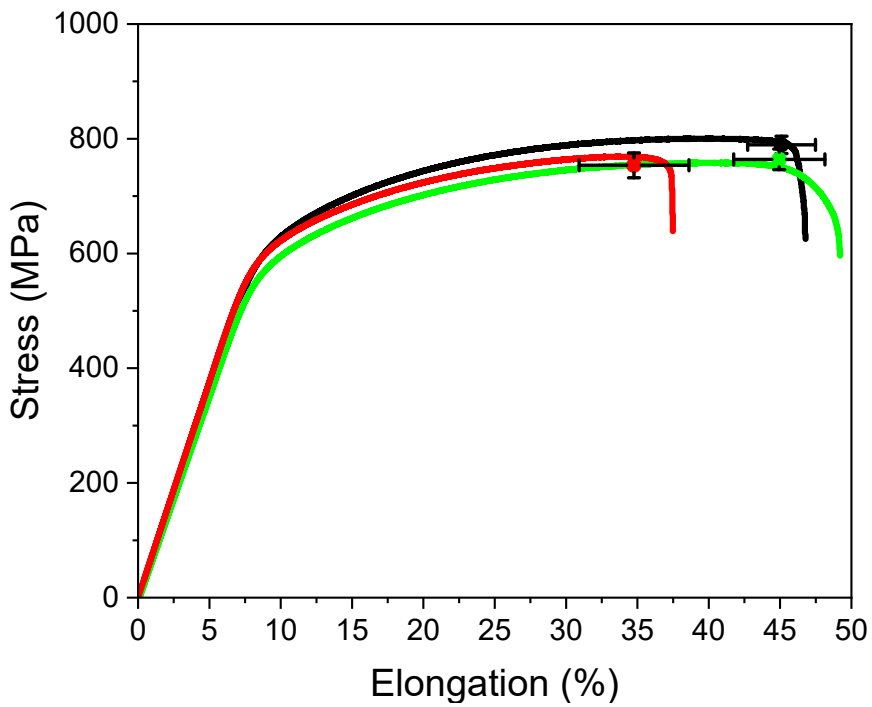

Fig. S31 Tensile results of Solution Annealed samples

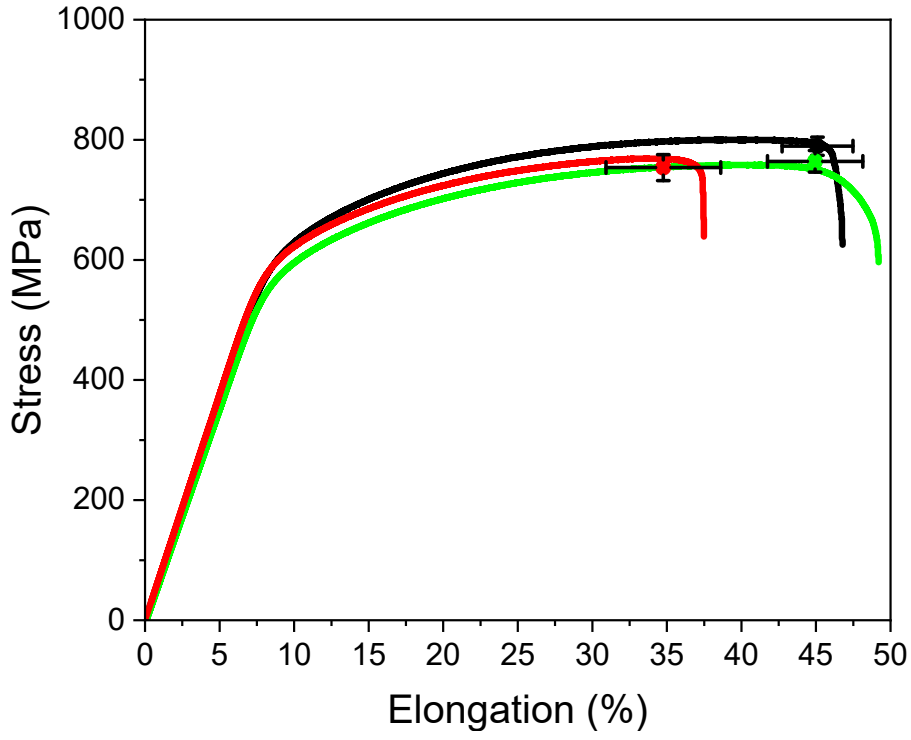

Fig. S32 Corrosion results of As Built samples

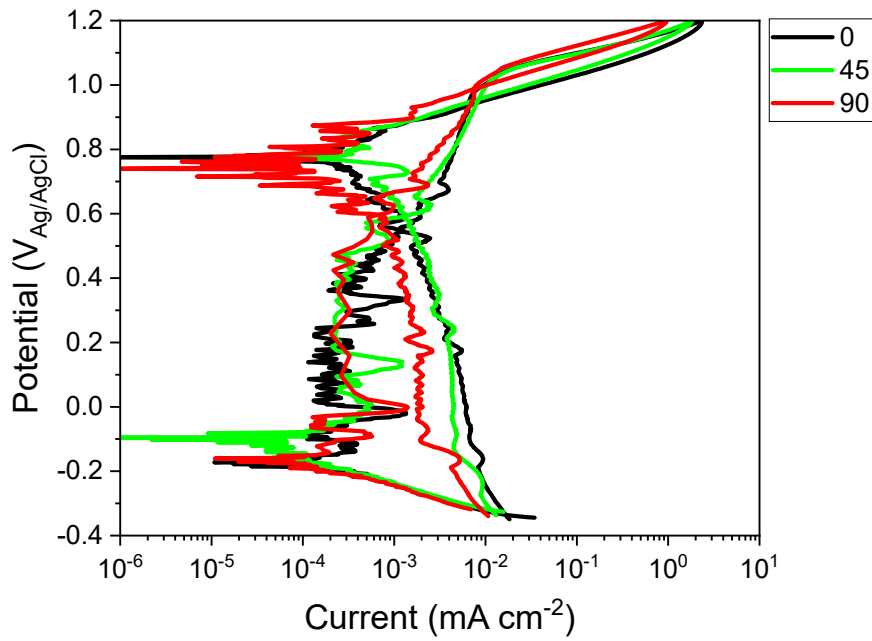

Fig. S33 Corrosion results of Solution Annealed samples



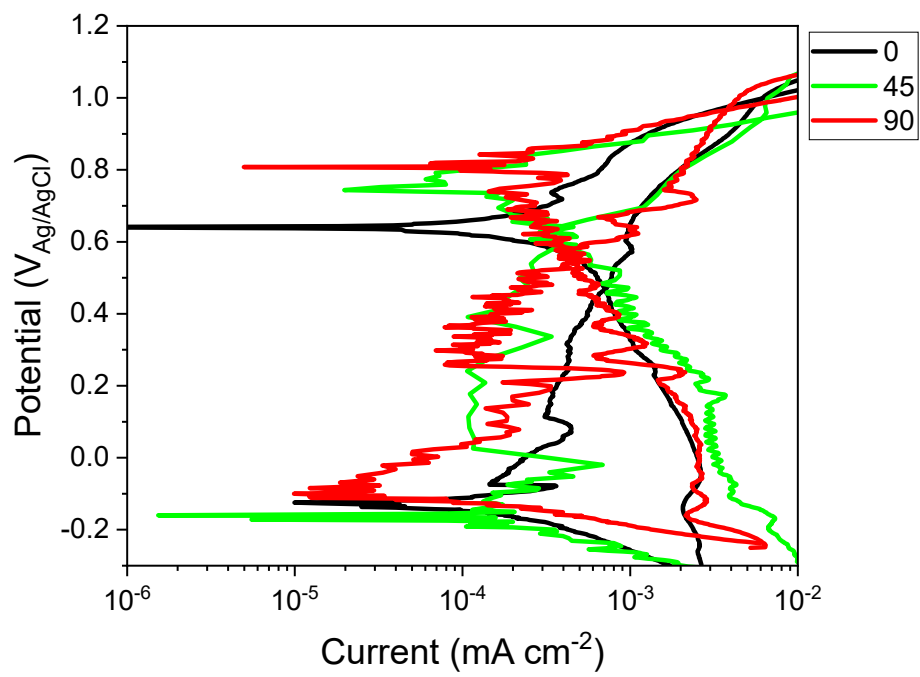

Supplement: d4ma00448e1.pdf [file d4ma00448e1.pdf]
